# Supplementary material for: Concept for Efficient Light Harvesting in Perovskite Materials via Solar Harvester with Multi-Functional Folded Electrode
Source: MDPI journal article supplement (doi:10.3390/nano11123362), 2021-12-11
Supplement: s1 [file s1]

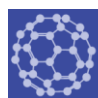

Supporting Information

# Concept for Efficient Light Harvesting in Perovskite Materials via Solar Harvester with Multi-Functional Folded Electrode

Mao-Qugn Wei <sup>1</sup>, Yu-Sheng Lai <sup>2,\*</sup>, Po-Hsien Tseng <sup>1</sup>, Mei-Yi Li <sup>2</sup>, Cheng-Ming Huang <sup>2</sup> and Fu-Hsiang Ko <sup>1,\*</sup>

<sup>1</sup> Department of Materials Science and Engineering, National Chiao Tung University, Hsinchu 300093, Taiwan; barry720919@gmail.com (M.-Q.W.); a19890302@gmail.com (P.-H.T.)

<sup>2</sup> Taiwan Semiconductor Research Institute, National Applied Research Laboratories, Hsinchu 300091, Taiwan; meiyi@narlabs.org.tw (M.-Y.L.); pfhaung@narlabs.org.tw (C.-M.H.)

\* Correspondence: yslai@narlabs.org.tw (Y.-S.L.); fhko@mail.nctu.edu.tw (F.-H.K.); Tel.: +886-03-577-3693-7532 (Y.-S.L.); +886-03-571-2121-55803 (F.-H.K.)

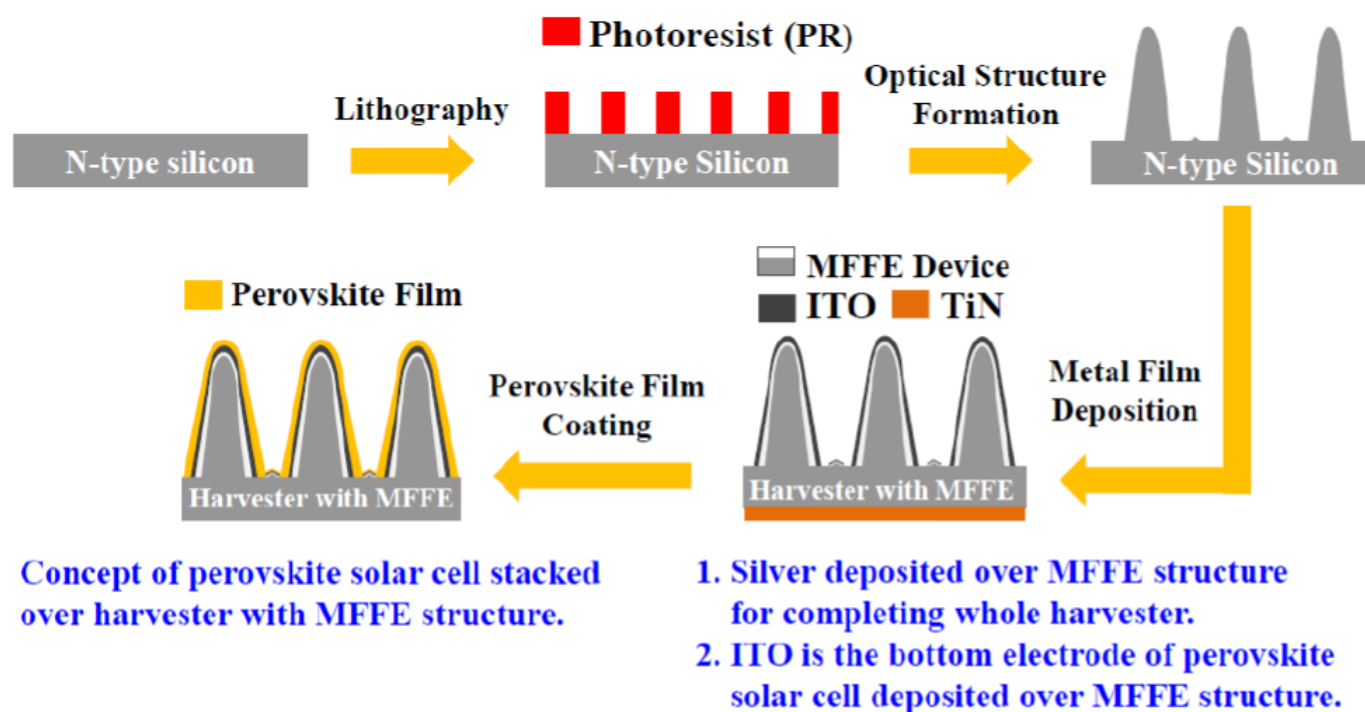

**Figure S1.** The brief flow for illustrating the design concept in this work about integrating solar harvester with the perovskite solar cell.
